# Supplementary material
Source: HighWire-hosted journal article supplement (https://openheart.bmj.com/content/9/1/e002026)
Supplement: inline-supplementary-material-1 [file inline-supplementary-material-1.pdf]

## Focused Cardiac Ultrasound Report

### Left Ventricle

Size: (LV End Diastolic Size \_\_\_\_\_ cm ) PS Long Axis

Normal                      Dilated (>5.4cm F, > 6 cm M)

Thickness: (IVS \_\_\_\_\_ cm    Posterior Wall \_\_\_\_\_ cm) PS Long Axis

Normal                      Left Ventricular Hypertrophy ( $\geq 1.2$  cm)

Systolic Function:      Normal                      Mildly reduced                      Severely Reduced

### Left Atrium

Size: \_\_\_\_\_ cm                      Normal                      Dilated (>4.0 cm) PS Long Axis

### Aortic Valve

Normal                      Thickened/Restricted

Peak Velocity \_\_\_\_\_ m/s Apical 5 or 3 chamber

Aortic Stenosis:              None                      Likely (AV Vmax  $\geq 2$  m/s)

Aortic Regurgitation:    None                      Trace/Mild                      Severe

### Mitral Valve

Normal                      Thickened/Restricted

Mean gradient \_\_\_\_\_ mmHg Apical 4 Chamber

Mitral Stenosis:              None                      Likely (mean gradient  $\geq 24$  mmHg)

Mitral Regurgitation:    None                      Mild                      Severe

### Tricuspid Valve:

Tricuspid Regurgitation:      None                      Trace/Mild                      Moderate/Severe

Peak Velocity \_\_\_\_\_ m/s Apical 4 Chamber

Pulmonary Hypertension:      Unlikely                      Likely (TR Vmax  $\geq 3$  m/s)

Pericardial Effusion

Absent

Present

Inferior Vena Cava

Subcostal

Size:      cm

Normal

Dilated (>2cm)

Respiratory variation >50%:

Present

Absent

Summary:

Normal cardiac ultrasound

Abnormal cardiac ultrasound

Comments:
